# Supplementary material
Source: PubMed Central journal article supplement (PMC3873634)
Supplement: NIHMS507730-supplement-1.pdf [file NIHMS507730-supplement-1.pdf]

# Restablecimiento de la Altura del Rodete para el Tratamiento de Lesiones de Bankart:

## Comparación de Construcciones de Anclas de Sutura

Mark A. Slabaugh, M.D., Nicole A. Friel, M.S., Vincent M. Wang, Ph.D. y  
Brian J. Cole, M.D., M.B.A.

**Propósito:** el propósito de este estudio fue evaluar las alturas del rodete glenoideo antes de la lesión y después de la reparación con 2 anclas de sutura: (1) la ancla de sutura tradicional asegurada con nudos y (2) la ancla de sutura sin nudo. **Métodos:** se examinaron diez pares coincidentes de cavidades glenoideas cadavéricas humanas. En cada espécimen, se desprendió el rodete de la posición 3:0 a la posición 6:30 en la parte anteroinferior de la cavidad glenoidea, y se reparó con (1) anclas de sutura tradicionales Bio-SutureTak ( $n = 10$ ) (Arthrex, Naples, FL) o (2) anclas de sutura sin nudo PushLock ( $n = 10$ , lado contralateral) (Arthrex). Con un digitalizador tridimensional, se midió la altura del rodete desde el punto más profundo de la superficie articular glenoidea hasta el extremo más alto del rodete en todos los especímenes, antes de la lesión y después de la reparación, en las posiciones 3:30, 4:30 y 5:30. Se calculó el grado de aumento de la altura del rodete como un incremento porcentual de la altura del rodete previa a la lesión respecto de la hallada después de la reparación. **Resultados:** en todos los especímenes, la altura del rodete aumentó significativamente de antes de la lesión (5.35 mm) a después de la reparación (8.05 mm) ( $159.1\% \pm 13.7\%$ ,  $P < 0.0001$ ). Los aumentos de la altura del rodete de antes de la lesión a después de la reparación fueron similares ( $P > 0.05$ ) con anclas de sutura Bio-SutureTak ( $164.6\% \pm 18.7\%$ ,  $P < 0.0001$ ) y con anclas de sutura PushLock ( $153.6\% \pm 5.8\%$ ,  $P < 0.0001$ ). El grado de aumento de la altura del rodete no varió según la localización anatómica ( $157.0\% \pm 50.2\%$ ,  $168.9\% \pm 51.0\%$  y  $150.4\% \pm 35.2\%$  en 3:30, 4:30 y 5:30, respectivamente;  $P = 0.46$ ). **Conclusiones:** se puede lograr un aumento de la altura del rodete para crear un aumento significativo de altura de antes de la lesión a después de la reparación del rodete. La diferencia de altura del rodete obtenida con una ancla de sutura tradicional y un ancla sin nudo no es estadísticamente significativa. **Relevancia clínica:** las construcciones de anclas de sutura tanto tradicionales como sin nudos permiten un restablecimiento confiable de la altura del rodete en un modelo de Bankart agudo.
